# Supplementary material for: Ru(ii)-(PTA) and -mPTA complexes with N2-donor ligands bipyridyl and phenanthroline and their antiproliferative activities on human multiple myeloma cell lines
Source: Royal Society of Chemistry journal article supplement (doi:10.1039/c7dt02051a), 2017-01-01
Supplement: c7dt02051a1.pdf [file c7dt02051a1.pdf]

## SUPPLEMENTARY MATERIAL

### **Ru(II)-(PTA) and –mPTA complexes with N<sub>2</sub>-donor Ligands Bipyridyl and Phenanthroline and their Antiproliferative Activities on Human Multiple Myeloma Cell Lines.**

Aleksandra Wołoszyn,<sup>a</sup> Claudio Pettinari,<sup>\*,b</sup> Riccardo Pettinari,<sup>b</sup> Greta Veronica,<sup>b</sup> Badillo Patzmay,<sup>b</sup> Anna Kwiecień,<sup>a</sup> Giulio Lupidi,<sup>b</sup> Massimo Nabissi,<sup>b</sup> Giorgio Santoni,<sup>b</sup> and Piotr Smoleński<sup>\*,a</sup>

<sup>a</sup> Faculty of Chemistry, University of Wrocław, ul. F. Joliot-Curie 14, 50-383 Wrocław, Poland; <sup>b</sup> School of Pharmacy, University of Camerino, via S. Agostino 1, 62032 Camerino MC, Italy.

KEYWORDS. Ruthenium, PTA, mPTA, Metal-based drugs.

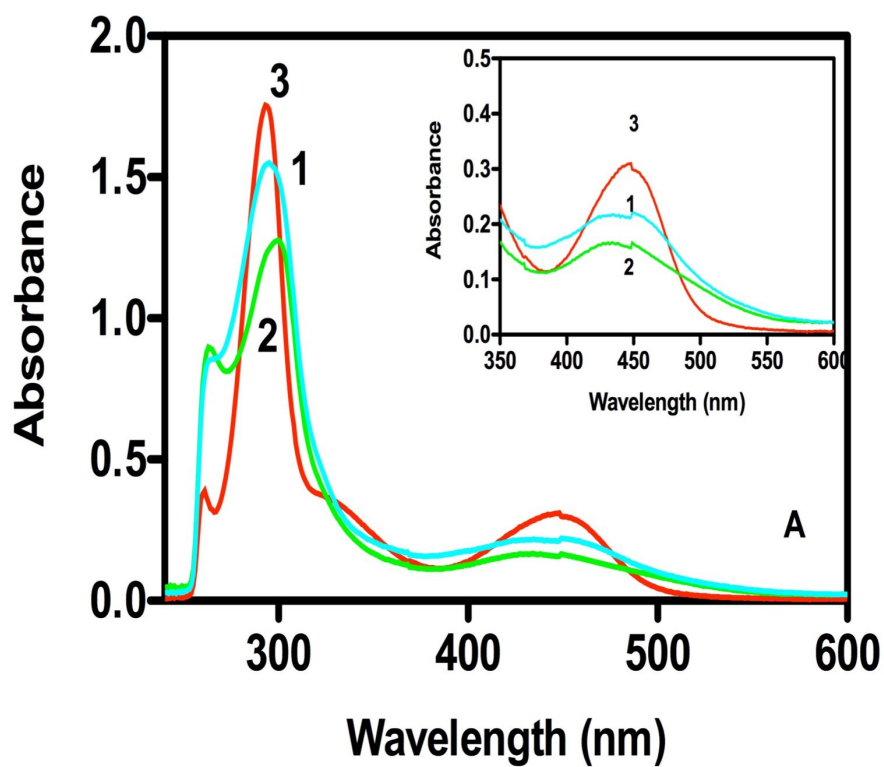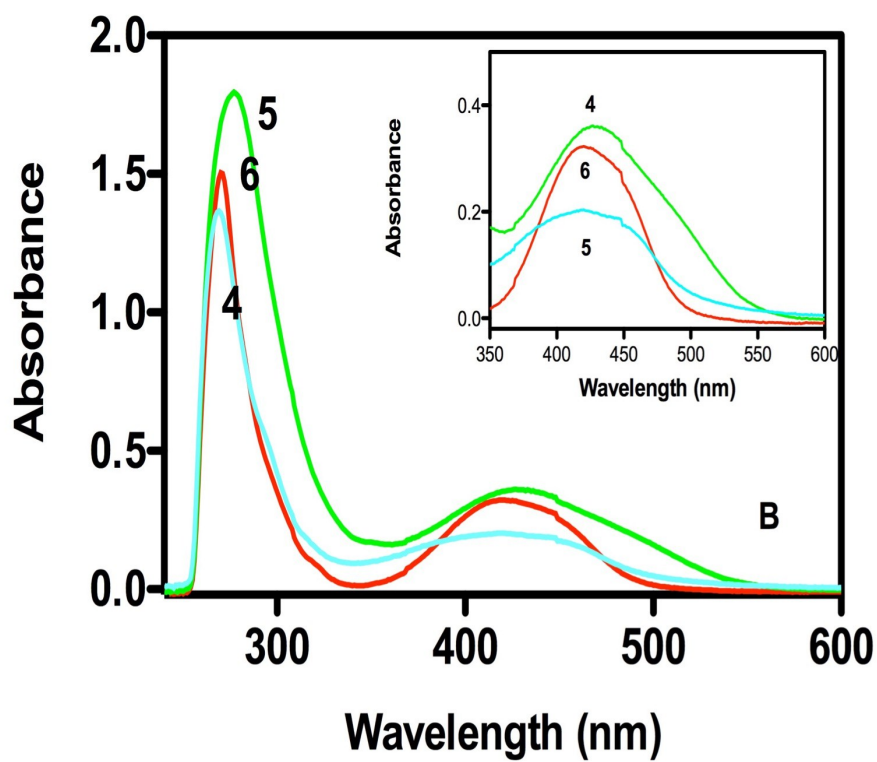

**Figure 1S.** Absorption spectral traces of complexes 1-6 in DMSO. Panel A, complex 1(95  $\mu$ M), complex 2(40  $\mu$ M), complex 3(45  $\mu$ M). Panel B, complex 4(30  $\mu$ M), complex 5(60  $\mu$ M), complex 6(70  $\mu$ M).

**Table 1S.** Wavelength ( $\lambda_{\max}$ ) and molar absorption values ( $\epsilon$ ) of different complexes in DMSO.

| Complex  | $\lambda_{\max}$ (nm) | $\epsilon$ ( $M^{-1} \text{ cm}^{-1}$ ) |
|----------|-----------------------|-----------------------------------------|
| <b>1</b> | 296                   | 23306                                   |
|          | 434                   | 1709                                    |
| <b>2</b> | 301                   | 18543                                   |
|          | 437                   | 3729                                    |
| <b>3</b> | 294                   | 24146                                   |
|          | 443                   | 4269                                    |
| <b>4</b> | 270                   | 26100                                   |
|          | 422                   | 6283                                    |
| <b>5</b> | 271                   | 21750                                   |
|          | 422                   | 2483                                    |
| <b>6</b> | 273                   | 28702                                   |
|          | 404                   | 6164                                    |

**RPMI**

| COMPOUND ( $\mu\text{M}$ ) | AnnV <sup>-</sup> PI <sup>+</sup> | AnnV <sup>+</sup> PI <sup>+</sup> | AnnV <sup>-</sup> PI <sup>-</sup> | Annv <sup>+</sup> PI <sup>-</sup> |
|----------------------------|-----------------------------------|-----------------------------------|-----------------------------------|-----------------------------------|
| Vehicle 5                  | 2.78 $\pm$ 0.4                    | 0.03 $\pm$ 0.0                    | 94.1 $\pm$ 5.4                    | 3.1 $\pm$ 0.2                     |
| 5, (80)                    | 1.9 $\pm$ 0.7                     | 0 $\pm$ 0.0                       | 92.3 $\pm$ 6.3                    | 5.9 $\pm$ 0.4                     |
| Vehicle 4                  | 2.4 $\pm$ 1.1                     | 0.1 $\pm$ 0.0                     | 93.7 $\pm$ 4.3                    | 3.7 $\pm$ 0.2                     |
| 4, (50)                    | 24.9 $\pm$ 2.4*                   | 1.6 $\pm$ 0.2                     | 66.7 $\pm$ 3.5*                   | 6.7 $\pm$ 0.3                     |
| Vehicle 1                  | 2 $\pm$ 0.1                       | 0.06 $\pm$ 0.0                    | 95 $\pm$ 6.2                      | 2.8 $\pm$ 0.1                     |
| 1, (120)                   | 1.6 $\pm$ 0.2                     | 0 $\pm$ 0.0                       | 95.7 $\pm$ 6.5                    | 2.6 $\pm$ 0.2                     |
| Vehicle 2                  | 2.2 $\pm$ 0.2                     | 0.2 $\pm$ 0.0                     | 92.5 $\pm$ 5.8                    | 5.1 $\pm$ 0.3                     |
| 2, (140)                   | 2.7 $\pm$ 0.1                     | 0.05 $\pm$ 0.0                    | 90.6 $\pm$ 7.1                    | 6.6 $\pm$ 0.2                     |

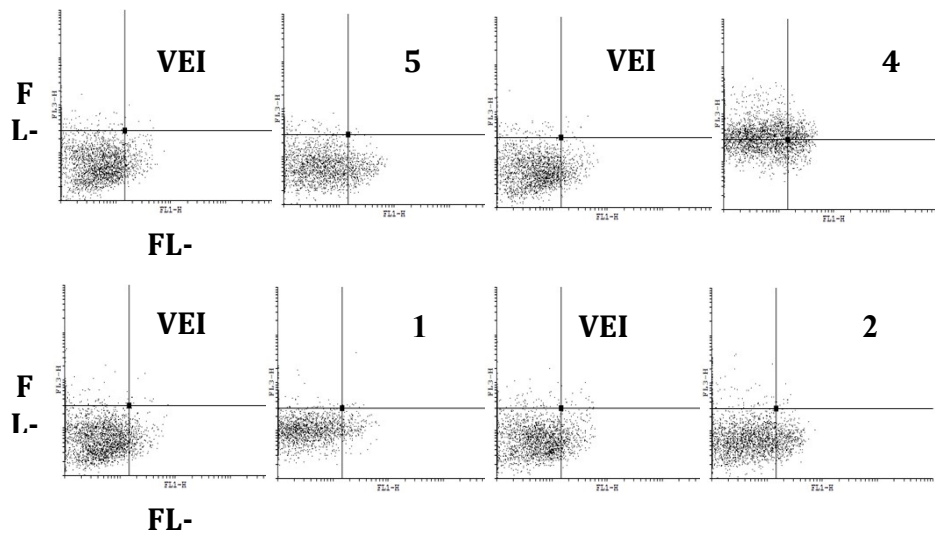

**Figure 2S.** Complexes inducing cell death. RPMI treated with the appropriate dose for each compound, were analysed for the percentage of PI<sup>+</sup> and Ann-V<sup>+</sup> cells by FACS analysis. Dot Plot are representative of one of three independent experiments. The values in the table represent the percentage of cells in each quadrant and are expressed as mean  $\pm$  SD. \* p < 0.05 vs vehicle treated cells.

**U266**

| COMPOUND ( $\mu\text{M}$ ) | AnnV <sup>-</sup> PI <sup>+</sup> | AnnV <sup>+</sup> PI <sup>+</sup> | AnnV <sup>-</sup> PI <sup>-</sup> | Annv <sup>+</sup> PI <sup>-</sup> |
|----------------------------|-----------------------------------|-----------------------------------|-----------------------------------|-----------------------------------|
| Vehicle 5                  | 1.3 $\pm$ 0.1                     | 0.4 $\pm$ 0.0                     | 94.9 $\pm$ 3.4                    | 3.36 $\pm$ 0.2                    |
| 5, (120)                   | 6.3 $\pm$ 0.3*                    | 1.5 $\pm$ 0.1                     | 70.1 $\pm$ 4.2*                   | 22.05 $\pm$ 1.3*                  |
| Vehicle 4                  | 1.7 $\pm$ 0.1                     | 0.3 $\pm$ 0.0                     | 96.3 $\pm$ 5.3                    | 1.65 $\pm$ 0.3                    |
| 4, (100)                   | 17.7 $\pm$ 0.2*                   | 9.6 $\pm$ 0.2                     | 60.7 $\pm$ 4.2                    | 11.9 $\pm$ 1.1                    |
| Vehicle 1                  | 0.7 $\pm$ 0.0                     | 0.15 $\pm$ 0.0                    | 94.2 $\pm$ 5.3                    | 4.9 $\pm$ 0.3                     |
| 1, (180)                   | 4.5 $\pm$ 0.3*                    | 1.9 $\pm$ 0.1                     | 78.3 $\pm$ 5.2*                   | 15.3 $\pm$ 0.9*                   |
| Vehicle 2                  | 1.3 $\pm$ 0.2                     | 0.1 $\pm$ 0.0                     | 96.4 $\pm$ 6.1                    | 2.1 $\pm$ 0.1                     |
| 2, (180)                   | 1.3 $\pm$ 0.1                     | 0.1 $\pm$ 0.0                     | 95.4 $\pm$ 5.8                    | 3.04 $\pm$ 0.1                    |

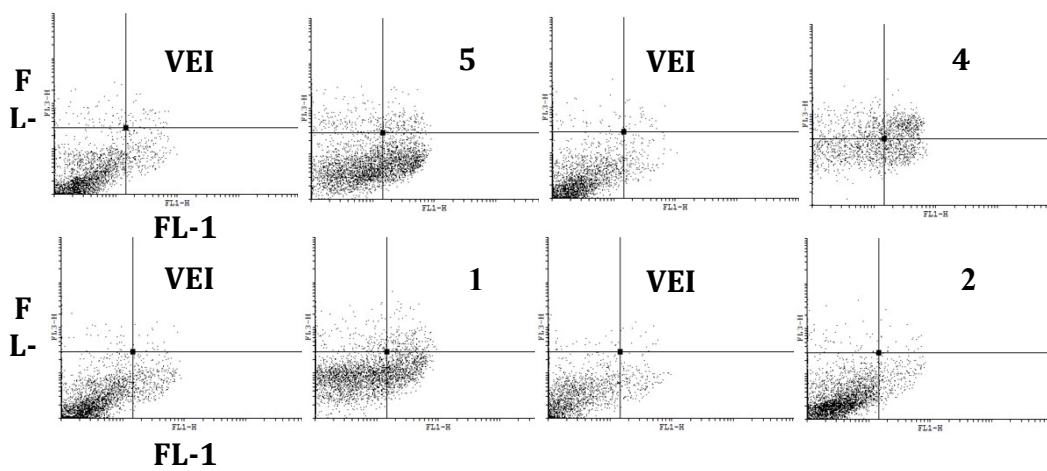

**Figure 3S.** Complexes inducing cell death. U266 treated with the appropriate dose for each compound, were analysed for the percentage of PI<sup>+</sup> and Ann-V<sup>+</sup> cells by FACS analysis. Dot Plot are representative of one of three independent experiments. The values in the table represent the percentage of cells in each quadrant and are expressed as mean  $\pm$  SD. \* p < 0.05 vs vehicle treated cells.

**CELL CYCLE ANALYSIS**

**TABLE S2**

**RPMI**

| <b>COMPLEX n°, (μM)</b> | <b>Sub-G0<br/>% of cells</b> | <b>G0/G1<br/>% of cells</b> | <b>S<br/>% of cells</b> | <b>G2/M<br/>% of cells</b> |
|-------------------------|------------------------------|-----------------------------|-------------------------|----------------------------|
| <b>Vehicle 5</b>        | 4.6 ±1                       | 34.5±2                      | 37.2±2                  | 23.8±2                     |
| <b>5, (80)</b>          | 26.9±2*                      | 26.2±2                      | 11.3±1                  | 34.6±3                     |
| <b>Vehicle 4</b>        | 3.94±0                       | 36.41±2                     | 34.02±2                 | 27.6±2                     |
| <b>4, (50)</b>          | 64.8±5*                      | 36.4±1                      | 0.0±0                   | 0.0±0                      |
| <b>Vehicle 1</b>        | 5.51±0                       | 29.2±2                      | 20.6±2                  | 44.6±3                     |
| <b>1, (120)</b>         | 9.4±6*                       | 36.6±1*                     | 22.0±0                  | 30.0±0                     |
| <b>Vehicle 2</b>        | 6.0±0                        | 24.2±2                      | 28.6±1                  | 40.1±4                     |
| <b>2, (140)</b>         | 22.6±1*                      | 37.9±1*                     | 24.1±1                  | 34.7±4                     |

**TABLE S3**

**U266**

| <b>COMPLEX (μM)</b> | <b>Sub-G0<br/>% of cells</b> | <b>G0/G1<br/>% of cells</b> | <b>S<br/>% of cells</b> | <b>G2/M<br/>% of cells</b> |
|---------------------|------------------------------|-----------------------------|-------------------------|----------------------------|
| <b>Vehicle 5</b>    | 0                            | 60.2±6                      | 21.3±1                  | 18.4±1                     |
| <b>5, (120)</b>     | 0                            | 84.8±6*                     | 3.6±0                   | 11.4±1                     |
| <b>Vehicle 4</b>    | 0                            | 59.2±4                      | 15.9±1                  | 24.9±2                     |
| <b>4, (100)</b>     | 0                            | 76.1±4*                     | 10.2±1                  | 12.8±1                     |
| <b>Vehicle 1</b>    | 0                            | 53.7±5                      | 19.6±1                  | 26.7±2                     |
| <b>1, (180)</b>     | 0                            | 65.3±4*                     | 9.9±1                   | 24.7±3                     |
| <b>Vehicle 2</b>    | 0                            | 54.7±4                      | 23.3±1                  | 21.9±2                     |
| <b>2, (180)</b>     | 0                            | 68.2±5*                     | 14.3±1                  | 29.4±2                     |

**Table S2, S3.** Ru complexes in regulating cell cycle. A, B) Cell cycle analysis in RPMI and U266 cell lines treated with the appropriate dose of Ru complexed (complex number in the table). Cell cycle was performed by PI incorporation assay and FACS analysis, after 48 h post-treatments. Histograms are representative of one of three independent experiments. The dose for each compound was described in the table. The values represent the percentage of cells in each phase and are expressed as mean ± SD. \* p < 0.05 vs vehicle treated cells.
